# Supplementary material for: Synaptic mechanisms modulate the spatiotemporal dynamics of striatal direct pathway neurons and motor output
Source: eLife. 2026 Jan 27;13:RP98122. doi: 10.7554/eLife.98122 (PMC12844889; doi:10.7554/eLife.98122)
Supplement: Supplementary file 1. [file elife-98122-supp1.xlsx]

## Sheet: Sheet1
Mouse	Total Cells	Sessions
19.2	318	5
1.2	78	2
20.2	311	2
24.2	20	2
25.2	307	4
26.2	176	2
2.7	136	3
