# Supplementary material for: Synaptic mechanisms modulate the spatiotemporal dynamics of striatal direct pathway neurons and motor output
Source: eLife. 2026 Jan 27;13:RP98122. doi: 10.7554/eLife.98122 (PMC12844889; doi:10.7554/eLife.98122)
Supplement: Supplementary file 2. [file elife-98122-supp2.xlsx]

## Sheet: Sheet1
Vehicle sessions for fenobam experiments
Mouse	Cells	Sessions
2.7	96	2
2.8	40	2
2.14	58	2
m974	293	1
m973	277	1
f979	164	1
f977	136	1
f976	387	1
Fenobam sessions
Mouse	Cells	Sessions
2.7	100	2
2.8	41	2
2.14	84	1
m974	91	1
m973	191	1
f979	29	1
f977	157	1
f976	219	1
