# Supplementary material for: Synaptic mechanisms modulate the spatiotemporal dynamics of striatal direct pathway neurons and motor output
Source: eLife. 2026 Jan 27;13:RP98122. doi: 10.7554/eLife.98122 (PMC12844889; doi:10.7554/eLife.98122)
Supplement: Supplementary file 3. [file elife-98122-supp3.xlsx]

## Sheet: Sheet1
Vehicle Sessions for JNJ experiments
Mouse	Total Cells	Sessions
2.2	111	2
2.21	150	2
2.25	671	3
2.24	107	2
2.26	199	2
JNJ sessions
Mouse	Total Cells	Sessions
2.2	152	2
2.21	94	2
2.25	822	3
2.24	58	2
2.26	36	2
Vehicle Sessions for JZL experiments
Mouse	Total Cells	Sessions
2.8	150	4
2.14	129	2
2.19	203	2
2.2	80	2
2.26	22	2
JZL sessions
Mouse	Total Cells	Sessions
2.8	65	2
2.14	33	2
2.19	29	1
2.2	120	2
2.26	20	2
