# Supplementary material for: Synaptic mechanisms modulate the spatiotemporal dynamics of striatal direct pathway neurons and motor output
Source: eLife. 2026 Jan 27;13:RP98122. doi: 10.7554/eLife.98122 (PMC12844889; doi:10.7554/eLife.98122)
Supplement: Supplementary file 4. [file elife-98122-supp4.xlsx]

## Sheet: Sheet1
WT (D1 cre ; Grm5 +/+) – dSPNs
Mouse	Cells	Sessions
2.1	23	1
2.19	83	2
1.13	35	1
1.26	22	2
1.27	45	1
1.32	237	2
1.33	128	2
1.35	280	3
1.39	159	3
cKO (D1 cre ; Grm5 fl/fl) - dSPNs
Mouse	Cells	Sessions
1.9	143	1
1.11	202	1
1.12	139	2
1.18	104	2
1.38	377	3
1.41	2	1
WT (D1 cre ; Grm5 +/+) – iSPNs
Mouse	Cells	Sessions
DO_1	114	1
DO_2	125	1
DO_3	39	1
cKO (D1 cre ; Grm5 fl/fl) – iSPNs
Mouse	Cells	Sessions
DO_4	63	1
DO_5	116	1
DO_6	221	1
